# Supplementary figures and images for: Gut microbiome variation is associated to Multiple Sclerosis phenotypic subtypes
Source: PubMed Central journal article supplement — Ann Clin Transl Neurol. 2020 Mar 12;7(4):406–19. doi: 10.1002/acn3.51004 (PMC7187717; doi:10.1002/acn3.51004), 2020-03-12

Percentage

100  
75  
50  
25  
0

HC\_FGFP

HC\_MICR

Enterotype

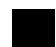

*R*

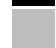

*P*

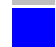

*B1*

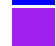

*B2*

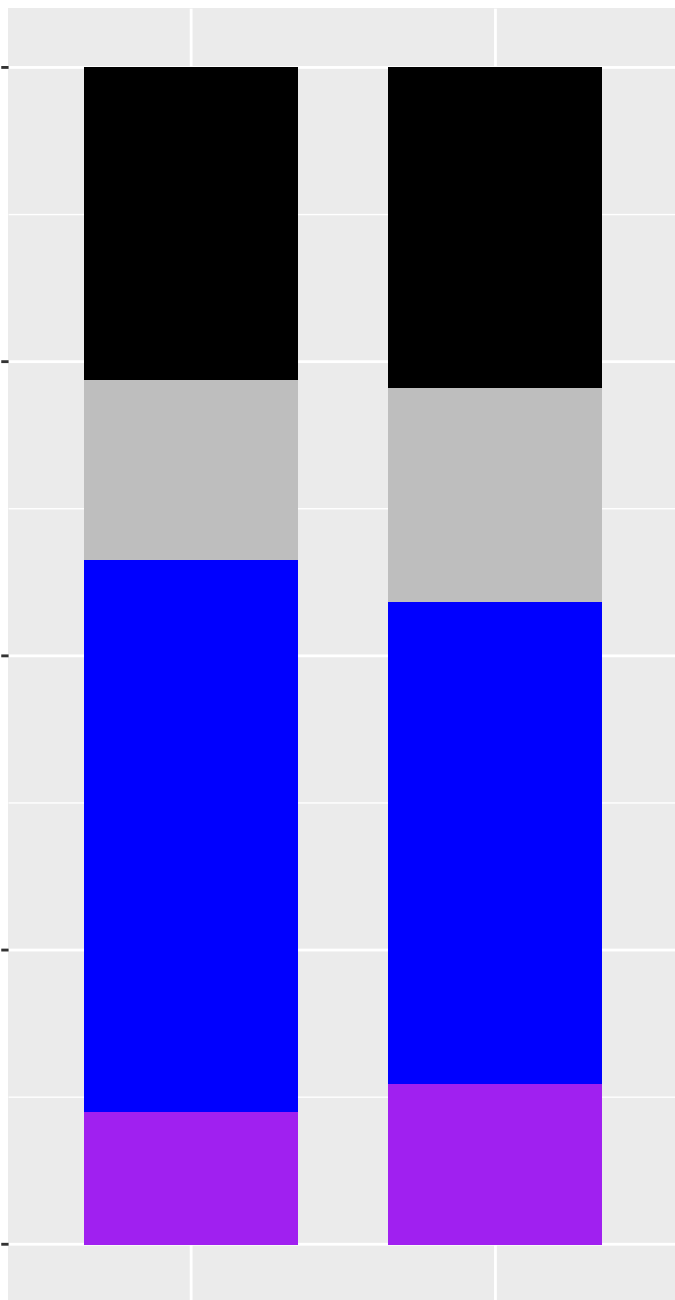

Supplement: ACN3-7-406-s002.pdf [file ACN3-7-406-s002.pdf]

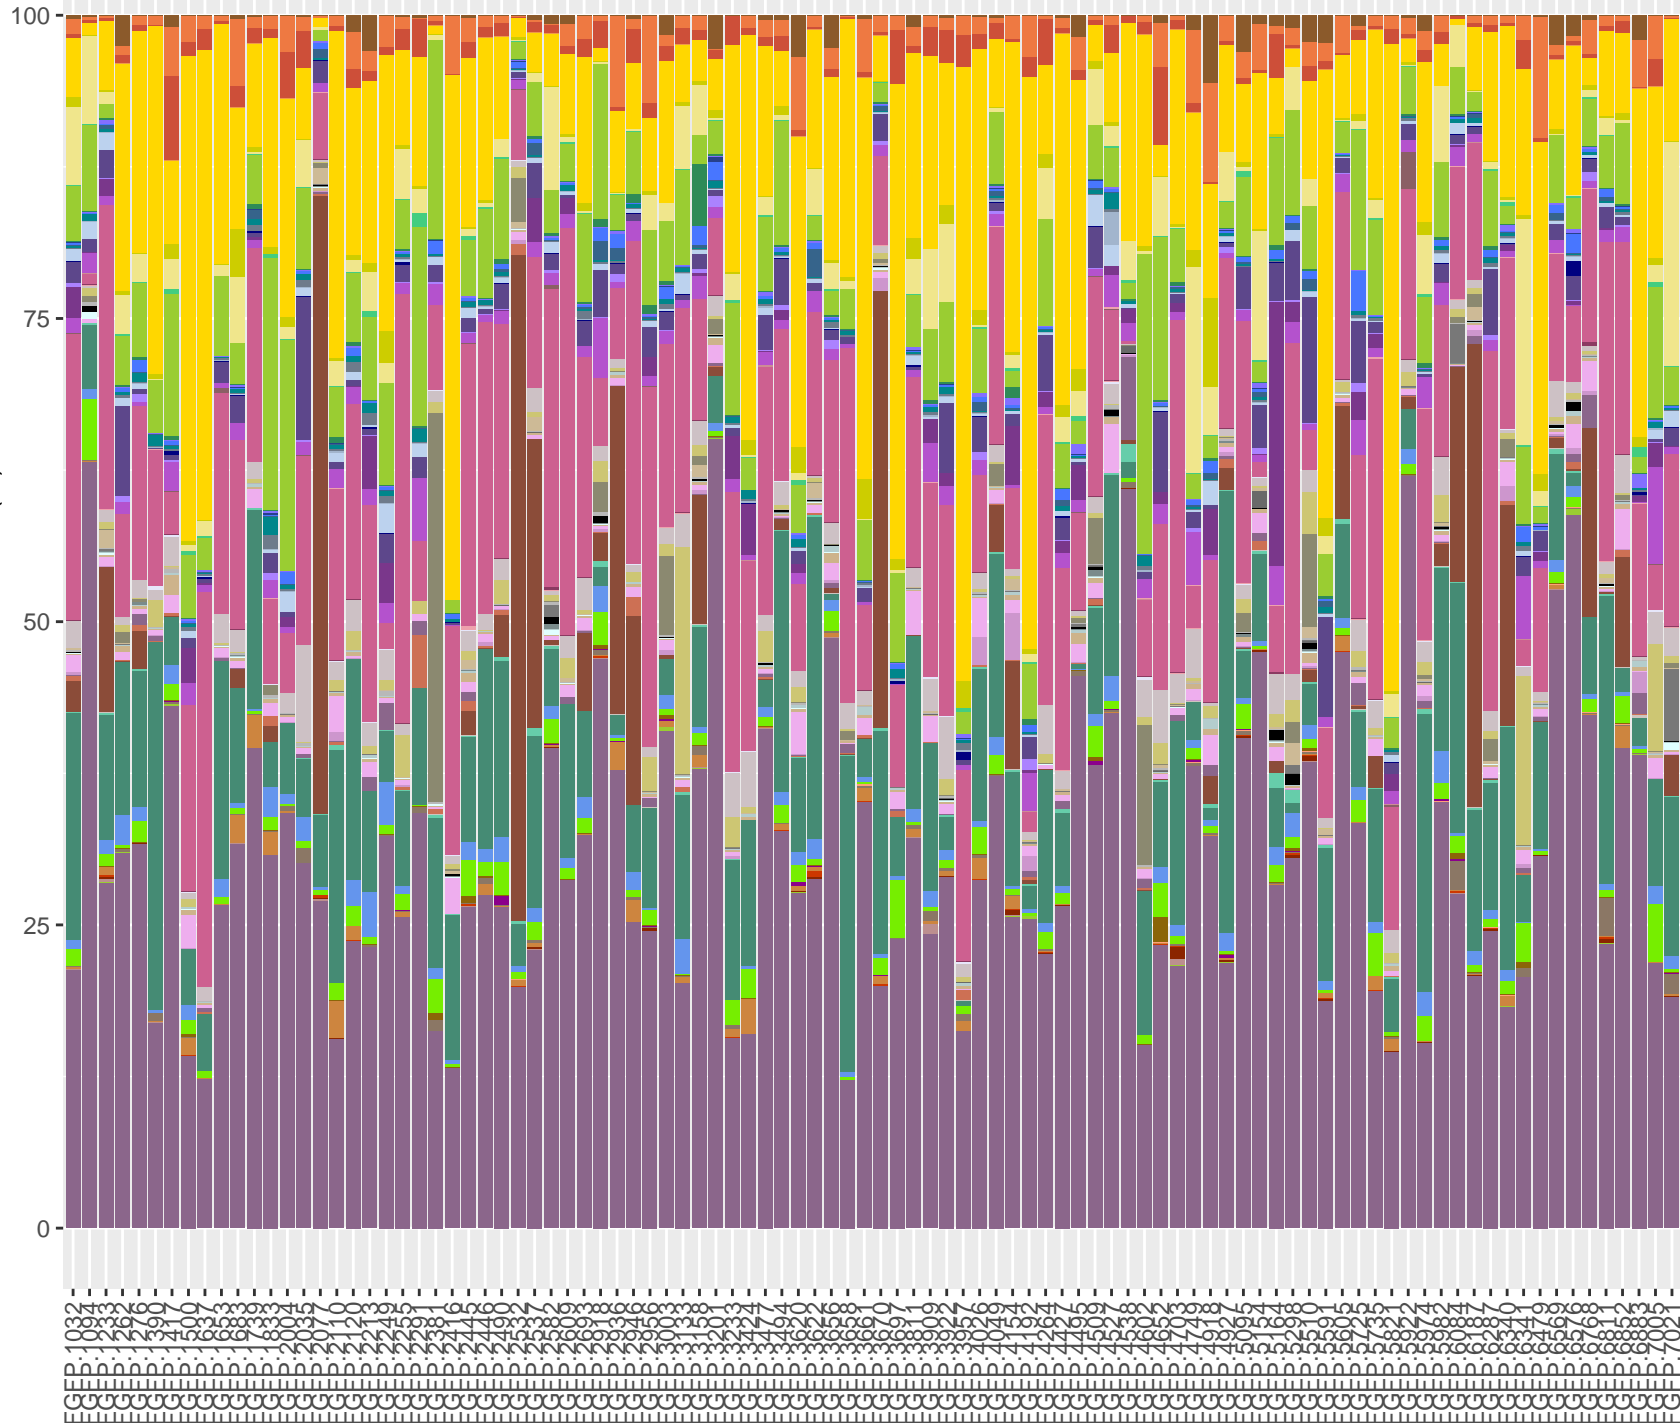

OTU

- |  |  |  |  |
|--|--|--|--|
|  |  |  |  |
|  |  |  |  |
|  |  |  |  |
|  |  |  |  |
|  |  |  |  |
|  |  |  |  |
|  |  |  |  |
|  |  |  |  |
|  |  |  |  |
|  |  |  |  |
|  |  |  |  |
|  |  |  |  |
|  |  |  |  |
|  |  |  |  |
|  |  |  |  |
|  |  |  |  |

HC\_FGFP (Participant number)

Supplement: ACN3-7-406-s004.pdf [file ACN3-7-406-s004.pdf]
